# Supplementary material
Source: PubMed Central journal article supplement (PMC2768918)

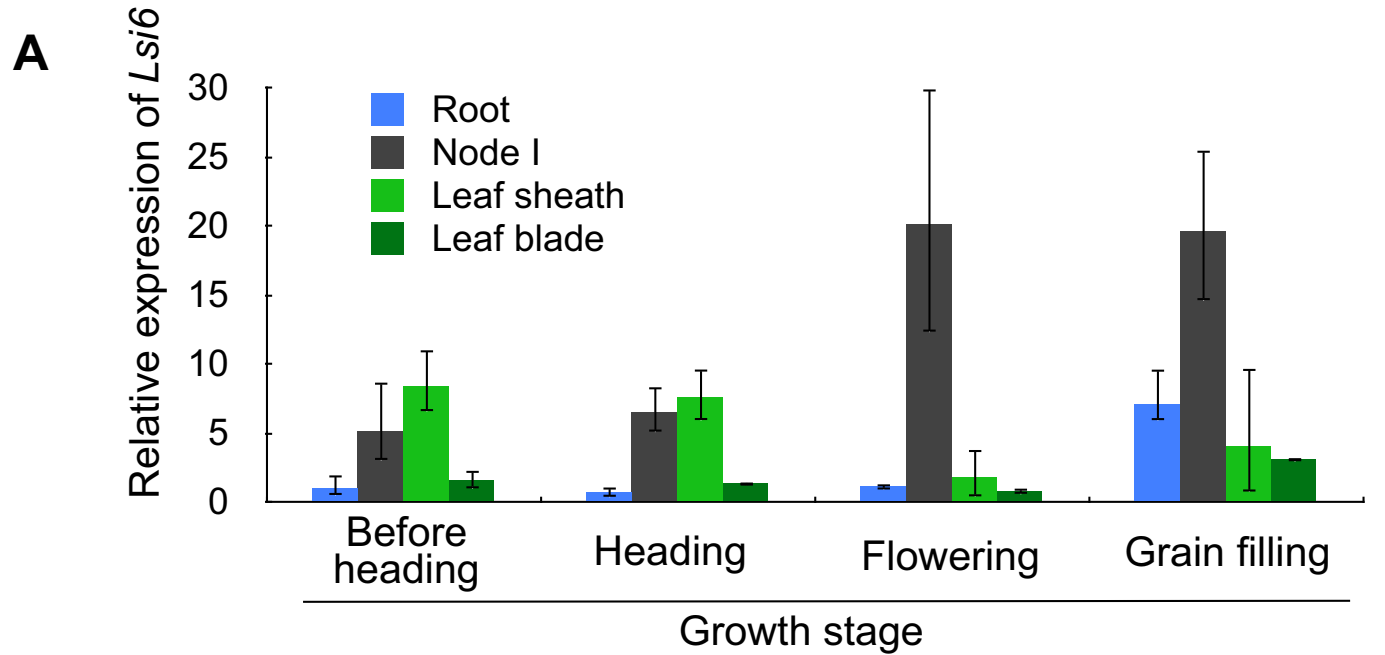

**Supplemental Figure 1.** Expression of *Lsi6* in different tissues normalized by Ubiquitin expression.

(A) Temporal variation of *Lsi6* expression in different rice tissues at the reproductive stages from before heading to grain filling. (B) Spatial expression of *Lsi6* in different rice tissues at flowering stage. The expression was determined by quantitative RT-PCR and expression level of Ubiquitin was used as an internal control. Expression relative to the root expression before heading (A) or unelongated stem (B) is shown. Data are means  $\pm$  SD of three biological replicates ( $n = 3$ ).

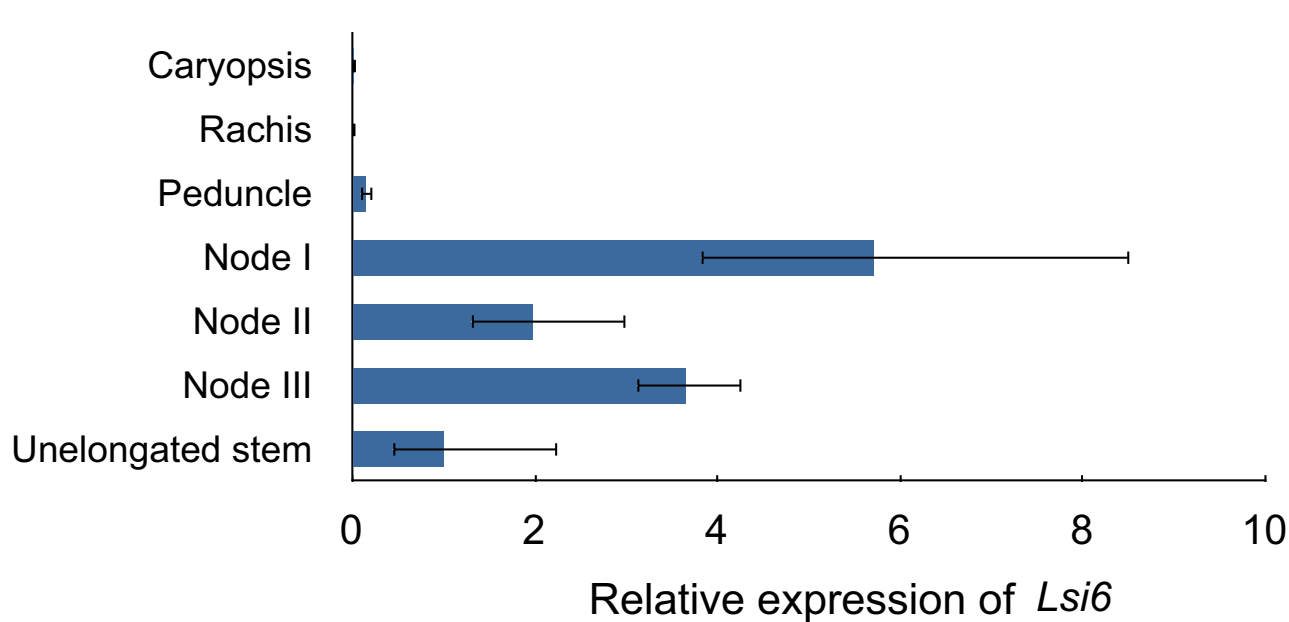

Supplement: tpc.109.069831_1.pdf [file tpc.109.069831_1.pdf]
